# Supplementary material for: MS1, a direct target of MS188, regulates the expression of key sporophytic pollen coat protein genes in Arabidopsis
Source: PubMed Central journal article supplement (PMC7410184; doi:10.1093/jxb/eraa219), 2020-05-06
Supplement: eraa219_suppl_supplementary-data-files.pdf [file eraa219_suppl_supplementary-data-files.pdf]

## Caleosin

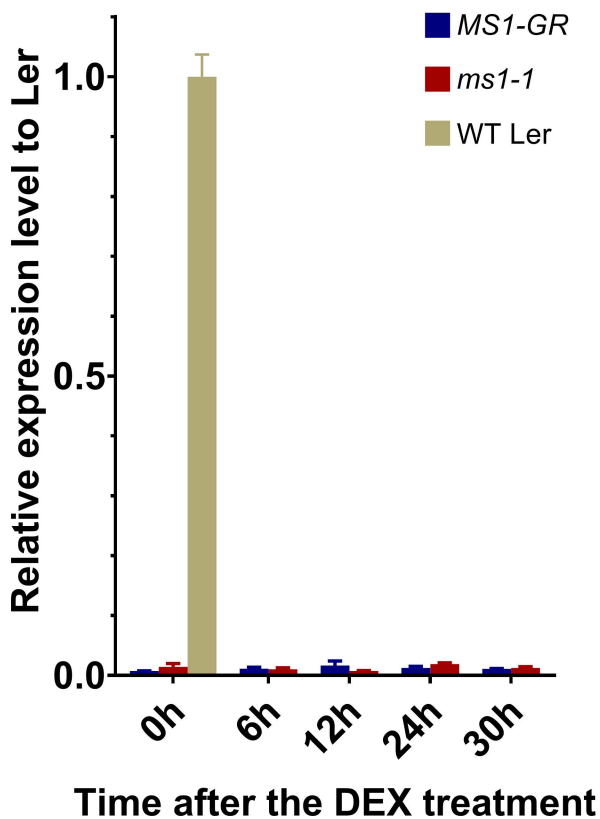

## CRRSP18

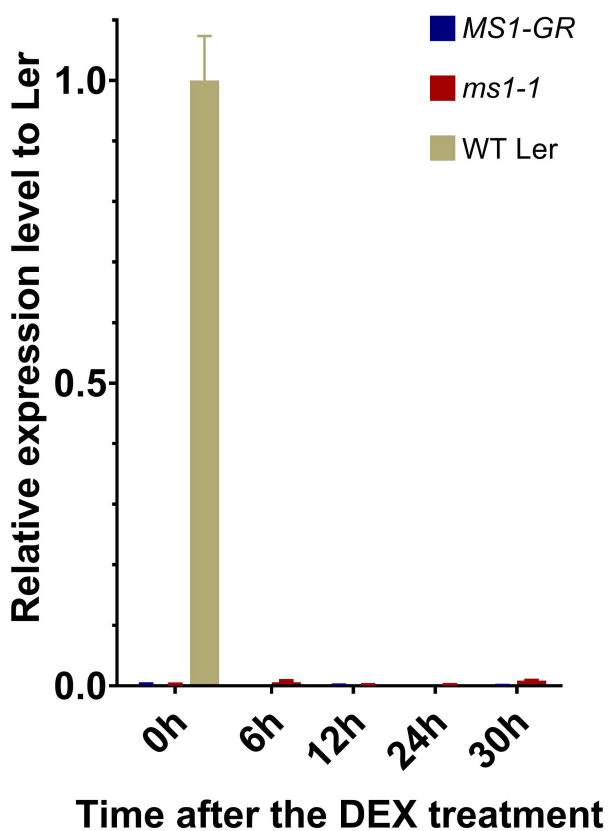

## CRRSP41

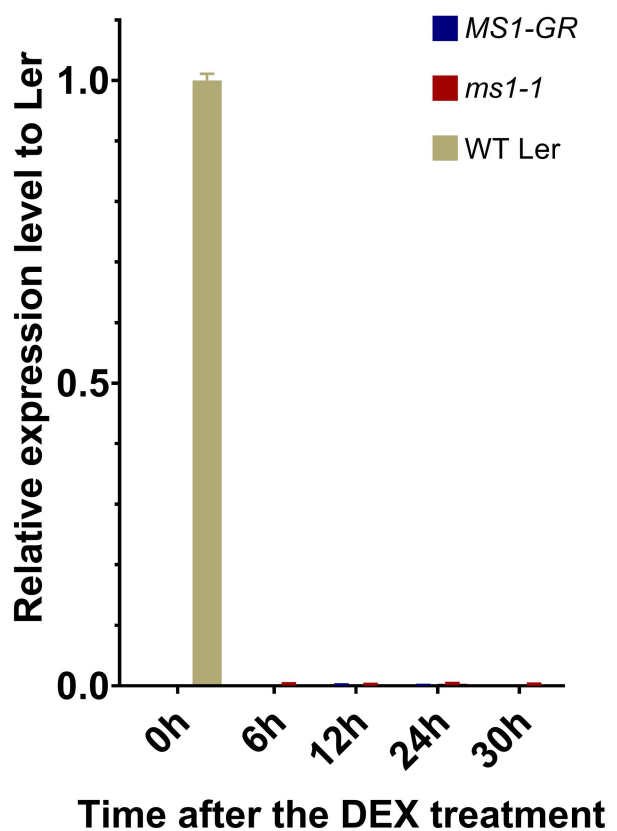

**Figure S1. sPCP Genes that showed no significant up-regulation 30h post DEX induction in the MS1-GR line.**

A time-course qRT-PCR detection of sPCP Caleosin and CRRSP18, 41 at 6, 12, 24 and 30 hours post DEX treatment in the transgenic line of pMS1:MS1-GR (*ms1-1* background) and the *ms1-1* mutant respectively. The expression data are presented in the same way as in Figure. 4.

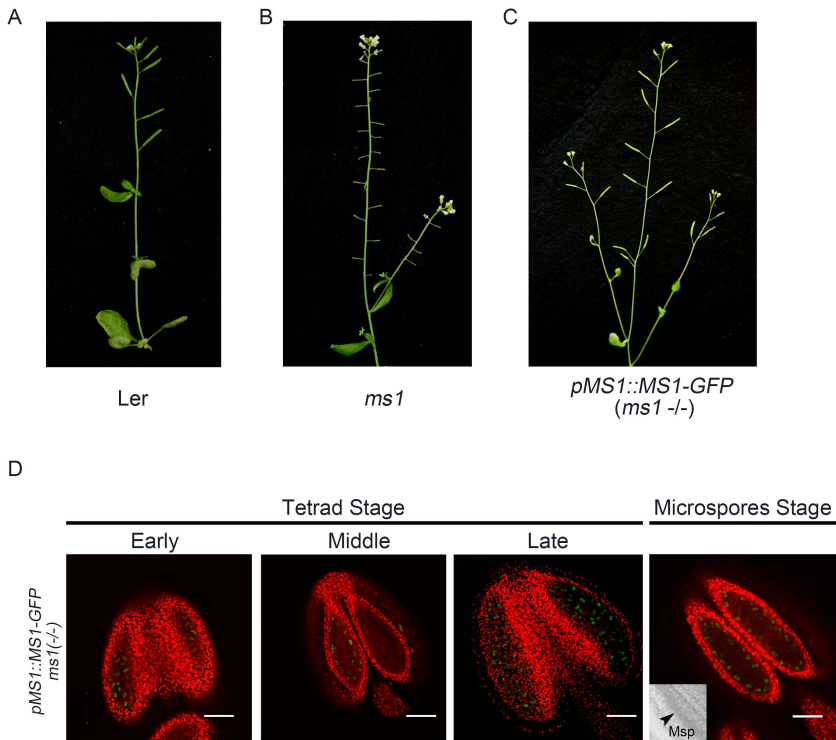

**Figure S2. MS1 Expression in *pMS1::MS1-GFP* complementation plants.**

(A)-(C) The phenotype of WT (*Ler-0*), *ms1-1*, *pMS1::MS1-GFP* complementation plant respectively and fluorescence confocal images of the MS1-GFP fusion proteins. The green channel shows the GFP expression (530 nm), and the red channel shows the chlorophyll autofluorescence (>560 nm). Bars = 50  $\mu$ m.

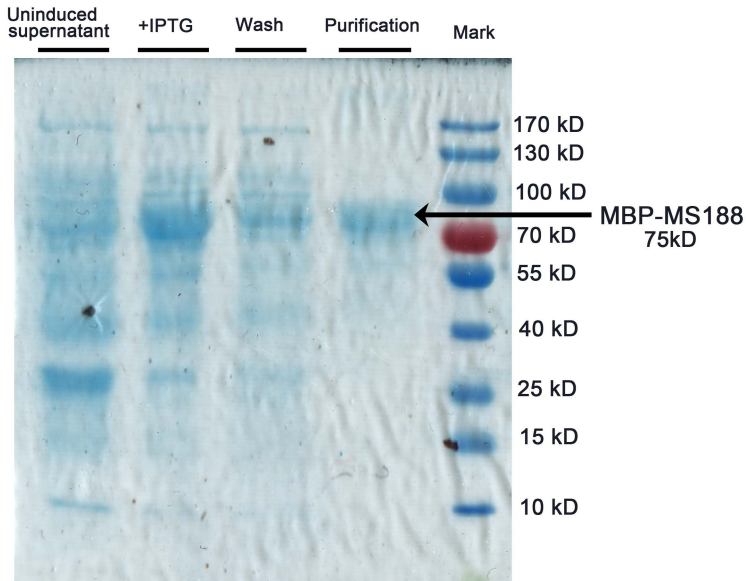

Figure S3. Expression and purification of the MS188 protein. The MS188 tagged with MBP of 76kD was induced and purified.

**Table1 List of primers used in the study and their sequences**

| Primer                        | Sequence                           | Note                       |
|-------------------------------|------------------------------------|----------------------------|
| CONT F                        | CCAACCACA ACTCCATATTTGTT           | For ChIP assays            |
| CONT R                        | ATAGCTTGACGGCTAGACGCAC             | For ChIP assays            |
| Probe <sup>MS1</sup> F        | TTAAGTAAATACCATTGCAATTTGC          | For ChIP assays            |
| Probe <sup>MS1</sup> R        | GCATCTATTACATAACACACACGTG          | For ChIP assays            |
| Probe-1 <sup>MS1</sup> -Bio F | BIOTIN-TTAAGTAAATACCATTGCAATTTGC   | For EMSA assays            |
| Probe-1 <sup>MS1</sup> F      | TTAAGTAAATACCATTGCAATTTGC          | For EMSA assays            |
| Probe-1 <sup>MS1</sup> R      | CGGTTTAAAGAAAGTTTCAAATTAT          | For EMSA assays            |
| Probe-2 <sup>MS1</sup> -Bio F | BIOTIN-AATCGACTAAATTGAGTTTGT       | For EMSA assays            |
| Probe-2 <sup>MS1</sup> F      | AATCGACTAAATTGAGTTTGT              | For EMSA assays            |
| Probe-2 <sup>MS1</sup> R      | GCATCTATTACATAACACA                | For EMSA assays            |
| <i>GRP14</i> comF             | CCGGAATTCAGGAAATAAGTCAAGTTGTTCC    | For complementation assays |
| <i>GRP14</i> comR             | CGCGGATCCCCATGTGGGTGGTGCAGCCGGTT   | For complementation assays |
| <i>GRP17</i> comF             | CGGGGTACCGGATGATCATATGGAGCAACTTG   | For complementation assays |
| <i>GRP17</i> comR             | AACTGCAGCTCCGCCATGTGGCCACCTCCA     | For complementation assays |
| <i>GRP18</i> comF             | CCGGAATTCAGAACAATGGTCAAGTTGTTCCAAC | For complementation assays |
| <i>GRP18</i> comR             | CGCGGATCCCCATGTGGGTGGTGTACTTCCA    | For complementation assays |
| <i>GRP19</i> comF             | CGCGGATCCCAAGGATGCATGACGATATGGAAA  | For complementation assays |
| <i>GRP19</i> comR             | GCTCTAGAGACGCCGGAACCTGCTGGGTTAGA   | For complementation assays |
| <i>EXL4</i> comF              | CCGGAATTCATTA AAAACTATTTTCACGGC    | For complementation assays |
| <i>EXL4</i> comR              | CGCGGATCCGGCAAGGCCATTCTTGATATCCT   | For complementation assays |
| <i>EXL6</i> comF              | CGCGGATCCTTTCTTACAATGCTATTTTCATC   | For complementation assays |
| <i>EXL6</i> comR              | AACTGCAGGGCAAGGCCTTTCGCTATCTGATA   | For complementation assays |
| <i>MS1</i> comF               | AGAATTCGAAGTGACTGTAAGTACCCAAAG     | For complementation assays |
| <i>MS1</i> comR               | AGTCGACGGGTAAAAAAGAGAGAGGAATAAG    | For complementation assays |
| MWD9 F                        | TAGGGTCGTGGTTGGTTG                 | For complementation assays |
| MWD9 R                        | CTGGCCTCTCTATCTGATAC               | For complementation assays |
| <i>MS1</i> JD F               | TCGTGGTGGAGTCAGTGGTGGGT            | For complementation assays |
| <i>MS1</i> JD R               | TGGGTGCTCAGGTAGTGGTTGTCG           | For complementation assays |
| <i>MS188</i> -PMAL F          | GTCGACATGGGTTCGGATTCCATGTTGT       | For protein expression     |
| <i>MS188</i> -PMAL R          | CTGCAGTCAAACCATATGATTGATGAGATCA    | For protein expression     |
| <i>GRP14</i> QPCR F           | CCACGGCATTAACCATAACCACA            | Primers of qPCR assays     |
| <i>GRP14</i> QPCR R           | CAAATCTCCTACGCCGAACCTA             | Primers of qPCR assays     |

|                           |                            |                          |
|---------------------------|----------------------------|--------------------------|
| <i>GRP16</i> QPCR F       | TTGTCATCTTCAGTCCGATTCTCG   | Primers of qPCR assays   |
| <i>GRP16</i> QPCR R       | CCCGGTTGATCTGCTTTGGTTGG    | Primers of qPCR assays   |
| <i>GRP17</i> QPCR F       | TAATCTTCGTGCGGTTTCGCTGTG   | Primers of qPCR assays   |
| <i>GRP17</i> QPCR R       | TCCTTCGGCTTTACTCCCATCCT    | Primers of qPCR assays   |
| <i>GRP18</i> QPCR F       | CCACGGCATTAAACCATAACAACAC  | Primers of qPCR assays   |
| <i>GRP18</i> QPCR R       | GCAGTCGGCTTAGCTCCCATCCT    | Primers of qPCR assays   |
| <i>GRP19</i> QPCR F       | AGTGGTCGCATGTATCATAAGCA    | Primers of qPCR assays   |
| <i>GRP19</i> QPCR R       | GTAGGTCCTCCCTGTACGTTTC     | Primers of qPCR assays   |
| <i>EXL4</i> QPCR F        | CAGTACAACGGAAAATTGAGGAG    | Primers of qPCR assays   |
| <i>EXL4</i> QPCR R        | CGTAATCATAACAACAACCCAT     | Primers of qPCR assays   |
| <i>EXL6</i> QPCR F        | CGGTACTCTTATGGATCTTGTC     | Primers of qPCR assays   |
| <i>EXL6</i> QPCR R        | ATATTACTTCGTAGGCTTTCTGG    | Primers of qPCR assays   |
| <i>CRRSP18</i> QPCR F     | CATCACCTACCAGTGCCGTATCGA   | Primers of qPCR assays   |
| <i>CRRSP18</i> QPCR R     | GATCTGCCCAGAAGTATCTAACG    | Primers of qPCR assays   |
| <i>CRRSP41</i> QPCR F     | CCCTTGCAATTAGCACCGCGTCTC   | Primers of qPCR assays   |
| <i>CRRSP41</i> QPCR R     | TCACTCATGTTGTTTGGGTTGGA    | Primers of qPCR assays   |
| <i>Caleosin</i> QPCR F    | AAATTCGAGGAAATATTCAACAAG   | Primers of qPCR assays   |
| <i>Caleosin</i> QPCR R    | GGAAAAGGCTACCATCGTAGATG    | Primers of qPCR assays   |
| <i>MS1</i> QPCR F         | TGTCCTTCACGGCTTCTTTC       | Primers of qPCR assays   |
| <i>MS1</i> QPCR R         | CGCGTCATTCAACCCTATTT       | Primers of qPCR assays   |
| <i>β-tubulin</i> QPCR F   | GACACTACACTGAAGGTGCTGAG    | Primers of qPCR assays   |
| <i>β-tubulin</i> QPCR R   | AAGCTGATGAACAGAGAGAGTTG    | Primers of qPCR assays   |
| <i>MS1</i> RT-PCR F       | ACGGATTTGGTCACTTGCTC       | Primers of RT-PCR assays |
| <i>MS1</i> RT-PCR R       | CTCGGTTAAGGCTGGTTAGG       | Primers of RT-PCR assays |
| <i>β-tubulin</i> RT-PCR F | GGACACTACACTGAAGGTGCTGAG   | Primers of RT-PCR assays |
| <i>β-tubulin</i> RT-PCR R | CAAGCTGATGAACAGAGAGAGTTG   | Primers of RT-PCR assays |
| <i>GRP14</i> RT-PCR F     | GTGGTTATTGCTGCCGTGGTCTC    | Primers of RT-PCR assays |
| <i>GRP14</i> RT-PCR R     | TTTCGCCTCCTCCTAATCCTCCA    | Primers of RT-PCR assays |
| <i>GRP16</i> RT-PCR F     | TTATCGCTGCCGTAGCATCTGTA    | Primers of RT-PCR assays |
| <i>GRP16</i> RT-PCR R     | TCCTCCCGGTTTATCTCCTCCTC    | Primers of RT-PCR assays |
| <i>GRP17</i> RT-PCR F     | TAATCTTCGTGCGGTTTCGCTGTG   | Primers of RT-PCR assays |
| <i>GRP17</i> RT-PCR R     | CCTTCGGACTTACCGCCTTTACC    | Primers of RT-PCR assays |
| <i>GRP18</i> RT-PCR F     | GCTACCGTGGTCTCCATAGTCTTCTT | Primers of RT-PCR assays |
| <i>GRP18</i> RT-PCR R     | CCTGGTTTATTTCCGAATGTTCCA   | Primers of RT-PCR assays |
| <i>GRP19</i> RT-PCR F     | GTTTGAGATTATTCAGGCGGTCTTC  | Primers of RT-PCR assays |



|                                |                                     |                             |
|--------------------------------|-------------------------------------|-----------------------------|
| <i>CRRSP41</i> QPCR-DEX F      | TCCACAGTGTTGTGACGGTAAACG            | For DEX induction assays    |
| <i>CRRSP41</i> QPCR-DEX R      | GGAGCTCTCATTGTACTGTTGCTG            | For DEX induction assays    |
| <i>ATA27/BGLU20</i> QPCR-DEX F | ATTCTCTCGTGGACTGGGAACC              | For DEX induction assays    |
| <i>ATA27/BGLU20</i> QPCR-DEX R | AGAGGCTCCTCAAACCCTTTGC              | For DEX induction assays    |
| <i>MYB99</i> QPCR-DEX F        | CATGCTCGCCTTGGAATAGATG              | For DEX induction assays    |
| <i>MYB99</i> QPCR-DEX R        | GTCTGTTCTTCTGGTAACTCCAC             | For DEX induction assays    |
| <i>ProMS188</i> F              | CGAGCTCAAGTTGTGTTTTTCCCAAGTCA       | For rescue transgenic assay |
| <i>ProMS188</i> R              | TCCCCCGGGTTCTTCTTTCTTTCTTAGTTTTT    | For rescue transgenic assay |
| <i>MS1</i> Genomic F           | TCCCCCGGGATGGCGAATCTGATTCGAA        | For rescue transgenic assay |
| <i>MS1</i> Genomic R           | ACGCGTCGACTTAGGGTAAAAAAGAGAGAGGAA   | For rescue transgenic assay |
| <i>Pro MS1</i> LUCF            | AACTGCAGCCGCTACTGGCAATTTCAAT        | Transient activating assays |
| <i>Pro MS1</i> LUCR            | CGGGATCCCGAATCAGAAATTTGGTTTGATC     | Transient activating assays |
| <i>MS188</i> Overexpress F     | GCTCTAGAATGGGTCGGATTCCATGTT         | Transient activating assays |
| <i>MS188</i> Overexpress R     | ACGCGTCGACAACCATATGATTGATGAGATCATCA | Transient activating assays |

---
